# Supplementary material
Source: publisher figshare collection journal article supplement (https://gsajournals.figshare.com/articles/dataset/_/8316494)
Supplement: Supplementary file 1 [file 1]

Table S5: Results of the likelihood ratio test comparing the effects of RNAi-mediated knockdown on adult anoxia tolerance each gene and sex. Significance at  $p < 0.001$ \*\*\*,  $p < 0.01$ \*\* ,  $p < 0.05$ \*

| gene    | sex    | term     | ChiSq    | df | p.value  | sig |
|---------|--------|----------|----------|----|----------|-----|
| babos   | female | genotype | 63.71036 | 1  | 1.44E-15 | *** |
|         | male   | genotype | 22.45306 | 1  | 2.15E-06 | *** |
| CG10089 | female | genotype | 88.40395 | 1  | 5.34E-21 | *** |
|         | male   | genotype | 63.81096 | 1  | 1.37E-15 | *** |
| MED6    | female | genotype | 55.20642 | 1  | 1.09E-13 | *** |
|         | male   | genotype | 40.16805 | 1  | 2.33E-10 | *** |
| ppk19   | female | genotype | 9.701022 | 1  | 0.001842 | **  |
|         | male   | genotype | 14.7325  | 1  | 0.000124 | *** |
| ppk30   | female | genotype | 56.58673 | 1  | 5.38E-14 | *** |
|         | male   | genotype | 4.833826 | 1  | 0.027907 | *   |
| SLO2    | female | genotype | 15.95757 | 1  | 6.48E-05 | *** |
|         | male   | genotype | 14.30642 | 1  | 0.000155 | *** |
| PMCA    | female | genotype | 28.70814 | 1  | 8.41E-08 | *** |
