# Supplementary material
Source: publisher figshare collection journal article supplement (https://gsajournals.figshare.com/articles/dataset/_/8316494)
Supplement: Supplementary file 2 [file 1]

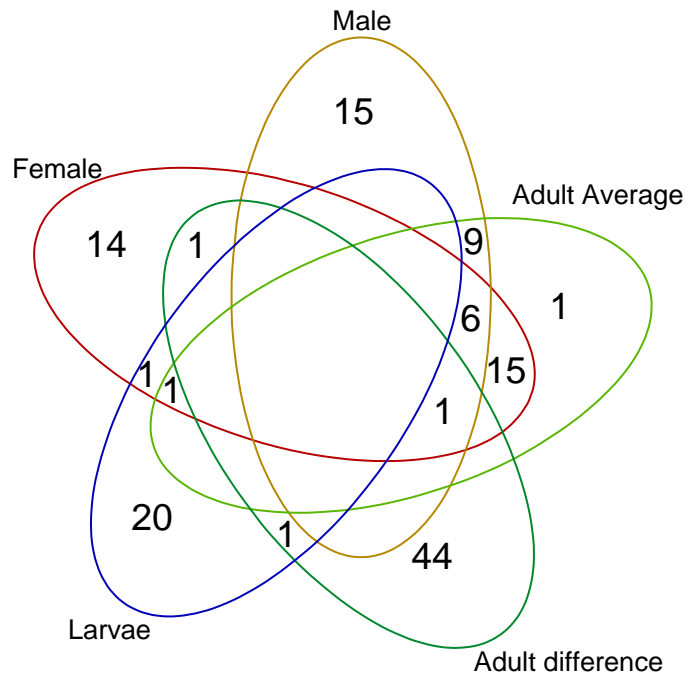

**Figure S5** Venn diagram showing the overlap of target genes between all adult and larval phenotypes.
