# Supplementary material
Source: publisher figshare collection journal article supplement (https://gsajournals.figshare.com/articles/dataset/_/8316494)
Supplement: Supplementary file 3 [file 1]

**Table S2:** ANOVAs for the effects of Wolbachia infection and inversions on anoxia tolerance

| Analysis   | Covariates        | Df | SS     | RSS     | AIC       | F      | P         |
|------------|-------------------|----|--------|---------|-----------|--------|-----------|
| Female     | none              |    |        | 12.7010 | -420.6000 |        |           |
|            | factor(wolbachia) | 1  | 0.0327 | 12.7340 | -422.1600 | 0.4094 | 0.5232    |
|            | factor(In_2L_t)   | 2  | 0.1788 | 12.8800 | -422.2100 | 1.1193 | 0.3291    |
|            | factor(In_2R_NS)  | 2  | 0.7344 | 13.4350 | -414.9900 | 4.5968 | 0.0115 *  |
|            | factor(In_3R_P)   | 2  | 0.1523 | 12.8530 | -422.5600 | 0.9531 | 0.3877    |
|            | factor(In_3R_K)   | 2  | 0.1931 | 12.8940 | -422.0200 | 1.2088 | 0.3013    |
|            | factor(In_3R_Mo)  | 2  | 0.1431 | 12.8440 | -422.6800 | 0.8954 | 0.4105    |
| Male       | none              |    |        | 8.4151  | -490.9900 |        |           |
|            | factor(wolbachia) | 1  | 0.0346 | 8.4498  | -492.2900 | 0.6545 | 0.4197    |
|            | factor(In_2L_t)   | 2  | 0.0113 | 8.4264  | -494.7600 | 0.1064 | 0.8991    |
|            | factor(In_2R_NS)  | 2  | 0.7265 | 9.1416  | -480.8300 | 6.8631 | 0.0014 ** |
|            | factor(In_3R_P)   | 2  | 0.0438 | 8.4590  | -494.1000 | 0.4140 | 0.6617    |
|            | factor(In_3R_K)   | 2  | 0.1615 | 8.5766  | -491.7400 | 1.5253 | 0.2207    |
|            | factor(In_3R_Mo)  | 2  | 0.0865 | 8.5016  | -493.2400 | 0.8169 | 0.4437    |
| Average    | none              |    |        | 9.5861  | -468.7100 |        |           |
|            | factor(wolbachia) | 1  | 0.0337 | 9.6198  | -470.1100 | 0.5583 | 0.4560    |
|            | factor(In_2L_t)   | 2  | 0.0573 | 9.6434  | -471.6900 | 0.4751 | 0.6227    |
|            | factor(In_2R_NS)  | 2  | 0.7288 | 10.3149 | -460.1800 | 6.0438 | 0.0030 ** |
|            | factor(In_3R_P)   | 2  | 0.0885 | 9.6747  | -471.1400 | 0.7342 | 0.4815    |
|            | factor(In_3R_K)   | 2  | 0.1755 | 9.7616  | -469.6100 | 1.4551 | 0.2365    |
|            | factor(In_3R_Mo)  | 2  | 0.1107 | 9.6968  | -470.7500 | 0.9178 | 0.4015    |
| Difference | none              |    |        | 3.8877  | -623.0400 |        |           |
|            | factor(wolbachia) | 1  | 0.0000 | 3.8877  | -625.0400 | 0.0011 | 0.9731    |
|            | factor(In_2L_t)   | 2  | 0.1510 | 4.0387  | -620.5200 | 3.0885 | 0.0483 *  |
|            | factor(In_2R_NS)  | 2  | 0.0067 | 3.8944  | -626.7400 | 0.1365 | 0.8725    |
|            | factor(In_3R_P)   | 2  | 0.0380 | 3.9257  | -625.3700 | 0.7780 | 0.4611    |
|            | factor(In_3R_K)   | 2  | 0.0073 | 3.8950  | -626.7200 | 0.1492 | 0.8615    |
|            | factor(In_3R_Mo)  | 2  | 0.0163 | 3.9040  | -626.3200 | 0.3341 | 0.7165    |
| Larvae     | none              |    |        | 3.6928  | -622.1800 |        |           |
|            | factor(wolbachia) | 1  | 0.0124 | 3.7052  | -623.6100 | 0.5268 | 0.4690    |
|            | factor(In_2L_t)   | 2  | 0.0365 | 3.7293  | -624.5100 | 0.7758 | 0.4621    |
|            | factor(In_2R_NS)  | 2  | 0.0742 | 3.7670  | -622.8100 | 1.5778 | 0.2097    |
|            | factor(In_3R_P)   | 2  | 0.0523 | 3.7450  | -623.8000 | 1.1109 | 0.3318    |
|            | factor(In_3R_K)   | 2  | 0.0931 | 3.7859  | -621.9700 | 1.9792 | 0.1416    |
|            | factor(In_3R_Mo)  | 2  | 0.0280 | 3.7207  | -624.9000 | 0.5943 | 0.5532    |

Significance at  $p < 0.001$ \*\*\*,  $p < 0.01$ \*\* ,  $p < 0.05$ \*
