# Supplementary material
Source: publisher figshare collection journal article supplement (https://gsajournals.figshare.com/articles/dataset/_/8316494)
Supplement: Supplementary file 4 [file 1]

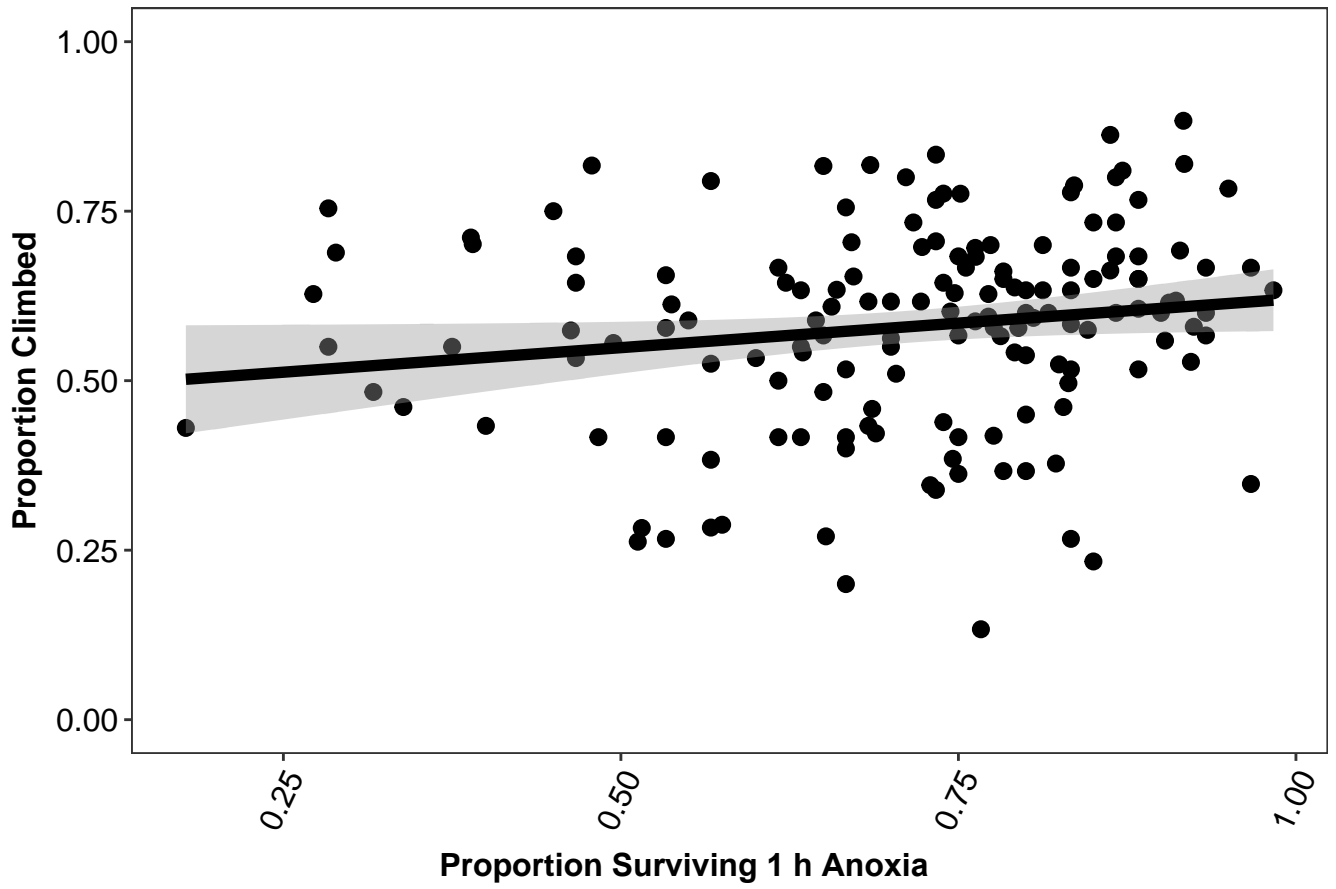

**Figure S1** The correlation between the proportion of larvae that exhibit escape behavior and the proportion of larvae surviving 1 h of anoxia.  $R=0.16$ ,  $p=0.047$
