# Supplementary material
Source: publisher figshare collection journal article supplement (https://gsajournals.figshare.com/articles/dataset/_/8316494)
Supplement: Supplementary file 5 [file 1]

Table S7: Results of the likelihood ratio test comparing the effects of RNAi-mediated knockdown on larval anoxia tolerance.

p<0.001\*\*\*, p<0.01\*\*, p<0.05\*

|         | estimate | ChiSq    | df | p.value  | sig |
|---------|----------|----------|----|----------|-----|
| cg2258  | 0.32     | 3.24     | 1  | 0.071861 |     |
| CG43795 | 0.347826 | 2.130435 | 1  | 0.1444   |     |
| chif    | 0.5      | 0        | 1  | 1        |     |
| Eip63F  | 0.307692 | 1.923077 | 1  | 0.165518 |     |
| IRSp53  | 0.75     | 1.125    | 1  | 0.288844 |     |
| Lasp    | 0.548387 | 0.290323 | 1  | 0.590014 |     |
| mamo    | 0        | 19       | 1  | 1.31E-05 | *** |
| Pde11   | 0.659574 | 4.787234 | 1  | 0.028671 | *   |
| Prm     | 0        | 15       | 1  | 0.000108 | *** |
| X11Lβ   |          | 0.4      | 1  | 0.527089 |     |
