# Supplementary material
Source: publisher figshare collection journal article supplement (https://gsajournals.figshare.com/articles/dataset/_/8316494)
Supplement: Supplementary file 7 [file 1]

**Table S1:** Correlations between anoxia tolerance and other phenotypes measured in the DGRP. Males and females were regressed individually to phenotypes where sex was listed along with line. Pooled Sex represents the correlations between anoxia tolerance pooled by sex and other DGRP phenotypes in which sex could not be determined (larval and embryo). DGRP phenotypes that included measurements of both sexes or were measured in a stage where sex could not be determined (larvae and embryo) were averaged by line and the correlated to larval anoxia tolerance, represented in the Larvae column. Significance at  $p < 0.001$  \*\*\*,  $p < 0.01$  \*\*,  $p < 0.05$  \*

| Trait                                                     | Male   |       | Female |        |       | Pooled Sex |   | Larvae |       |     | Citation                    |
|-----------------------------------------------------------|--------|-------|--------|--------|-------|------------|---|--------|-------|-----|-----------------------------|
|                                                           | cor    | p     | cor    | p      |       | cor        | p | cor    | p     |     |                             |
| sensitivity to oxidative stress (negative geotaxis)       | 0.057  | 0.443 | 0.126  | 0.051  |       |            |   | 0.317  | 0.000 | *** | Jordan et al. (2012)        |
| sensitivity to oxidative stress (startle response)        | -0.157 | 0.035 | *      | -0.135 | 0.037 | *          |   | 0.020  | 0.799 |     |                             |
| mito function (P:O ratio)                                 | -0.131 | 0.426 |        | 0.099  | 0.510 |            |   | -0.031 | 0.856 |     | Jumbo-Lucioni et al. (2012) |
| mito function (State 3)                                   | 0.022  | 0.893 |        | -0.047 | 0.753 |            |   | 0.415  | 0.011 | *   |                             |
| mito function (State 4)                                   | 0.190  | 0.246 |        | -0.198 | 0.182 |            |   | -0.141 | 0.406 |     |                             |
| chill coma recovery                                       | 0.207  | 0.006 | **     | 0.160  | 0.016 | *          |   | 0.047  | 0.561 |     | Mackay et al (2012)         |
| startle response                                          | -0.016 | 0.827 |        | 0.020  | 0.754 |            |   | -0.006 | 0.941 |     |                             |
| starvation resistance                                     | 0.156  | 0.029 | *      | 0.143  | 0.022 | *          |   | -0.057 | 0.453 |     |                             |
| alcohol tolerance                                         | 0.186  | 0.009 | **     | 0.159  | 0.011 | *          |   | -0.002 | 0.978 |     | Morozova et al (2015)       |
| resistance to fungal infection (MA549)                    | 0.058  | 0.431 |        | 0.061  | 0.348 |            |   | 0.087  | 0.266 |     | Wang et al (2017)           |
| resistance to fungal infection (PA14)                     | 0.184  | 0.089 |        | 0.424  | 0.001 | ***        |   | 0.201  | 0.080 |     |                             |
| oxidative stress paraquat                                 | 0.125  | 0.110 |        | 0.021  | 0.761 |            |   | 0.012  | 0.884 |     | Weber et al (2012)          |
| oxidative stress msb                                      | 0.109  | 0.166 |        | 0.281  | 0.001 | ***        |   | 0.184  | 0.026 | *   |                             |
| food intake                                               | -0.083 | 0.273 |        | -0.194 | 0.003 | **         |   | 0.124  | 0.119 |     | Garlapow et al 2015         |
| boric acid toxicity                                       |        |       |        | 0.098  | 0.167 |            |   |        |       |     | Najarro et al (2017)        |
| mated lifespan                                            |        |       |        | -0.051 | 0.439 |            |   |        |       |     | Durham et al (2014)         |
| fecundity                                                 |        |       |        | 0.037  | 0.573 |            |   |        |       |     |                             |
| traumatic brain injury                                    |        |       |        | 0.052  | 0.446 |            |   |        |       |     | Katzenberger et al (2015)   |
| susceptibility to enteric infection                       |        |       |        | 0.291  | 0.001 | ***        |   |        |       |     | Bou Sleiman et al. (2015)   |
| tolerance to bacterial infection                          |        |       |        | 0.117  | 0.093 |            |   |        |       |     | Howick and Lazzaro (2017)   |
| bacterial load                                            |        |       |        | -0.089 | 0.201 |            |   |        |       |     |                             |
| genotypic deviation of tolerance from bacterial infection |        |       |        | -0.023 | 0.742 |            |   |        |       |     |                             |
| virgin female lifespan                                    |        |       |        | 0.284  | 0.001 | ***        |   |        |       |     | Ivanov et al. (2015)        |
| egg to adult viability 25C                                | 0.127  | 0.528 |        | 0.011  | 0.955 |            |   | -0.303 | 0.141 |     | Rohde et al. (2016)         |
| egg to adult viability 28C                                | 0.273  | 0.178 |        | 0.195  | 0.339 |            |   | -0.299 | 0.156 |     |                             |
| Genotype x Environment                                    | -0.090 | 0.663 |        | -0.155 | 0.450 |            |   | 0.186  | 0.383 |     |                             |
| Heat resistance (time to knockdown)                       |        |       |        | -0.115 | 0.569 |            |   |        |       |     |                             |
| Metabolic rate                                            |        |       |        | -0.230 | 0.316 |            |   |        |       |     |                             |
| HSP70 expression                                          |        |       |        | -0.299 | 0.156 |            |   |        |       |     |                             |
| Adbdomen length 17C                                       |        |       |        | 0.051  | 0.486 |            |   |        |       |     | Lafuente et al. (2018)      |
| Thorax length 17C                                         |        |       |        | -0.097 | 0.189 |            |   |        |       |     |                             |
| Abdomen length 28C                                        |        |       |        | -0.017 | 0.821 |            |   |        |       |     |                             |
| Thorax length 28C                                         |        |       |        | -0.031 | 0.674 |            |   |        |       |     |                             |
| Ctmax                                                     | -0.145 | 0.413 |        | -0.119 | 0.503 |            |   | -0.234 | 0.197 |     | Rolandi et al. (2018)       |
| endoplasmic ret stress (hazard ratio)                     | -0.177 | 0.060 |        |        |       |            |   |        |       |     | Chow et al (2013)           |
| endoplasmic ret stress (LT50)                             | -0.317 | 0.001 | ***    |        |       |            |   |        |       |     |                             |
| male aggression                                           | 0.027  | 0.707 |        |        |       |            |   |        |       |     | Shorter et al (2015)        |
| radiation resistance                                      | -0.076 | 0.345 |        |        |       |            |   |        |       |     | Vaisnav et al. (2014)       |
| glucose pooled                                            | -0.119 | 0.162 |        |        |       |            |   |        |       |     | Unckless et al (2015)       |
| glucose high glucose                                      | -0.078 | 0.358 |        |        |       |            |   |        |       |     |                             |
| glucose low glucose                                       | -0.088 | 0.294 |        |        |       |            |   |        |       |     |                             |
| glycerol pooled                                           | -0.194 | 0.022 | *      |        |       |            |   |        |       |     |                             |
| glycerol high glucose                                     | -0.224 | 0.007 | **     |        |       |            |   |        |       |     |                             |
| glycerol low glucose                                      | -0.104 | 0.216 |        |        |       |            |   |        |       |     |                             |
| glycogen pooled                                           | -0.040 | 0.640 |        |        |       |            |   |        |       |     |                             |
| glycogen high glucose                                     | -0.084 | 0.320 |        |        |       |            |   |        |       |     |                             |
| glycogen low glucose                                      | 0.017  | 0.838 |        |        |       |            |   |        |       |     |                             |
| triglyceride pooled                                       | -0.163 | 0.055 |        |        |       |            |   |        |       |     |                             |
| triglyceride high glucose                                 | -0.128 | 0.129 |        |        |       |            |   |        |       |     |                             |
| triglyceride low glucose                                  | -0.128 | 0.128 |        |        |       |            |   |        |       |     |                             |
| protein pooled                                            | 0.009  | 0.919 |        |        |       |            |   |        |       |     |                             |
| protein high glucose                                      | -0.023 | 0.791 |        |        |       |            |   |        |       |     |                             |

|                                                              |                 |                |        |       |        |       |        |                         |
|--------------------------------------------------------------|-----------------|----------------|--------|-------|--------|-------|--------|-------------------------|
| protein low glucose<br>meanweight (ug)<br>pooled             | 0.020<br>-0.026 | 0.811<br>0.758 |        |       |        |       |        |                         |
| meanweight (ug) high<br>glucose                              | -0.052          | 0.540          |        |       |        |       |        |                         |
| meanweight (ug) low<br>glucose                               | -0.004          | 0.966          |        |       |        |       |        |                         |
| low glucose PC1                                              | 0.046           | 0.583          |        |       |        |       |        |                         |
| low glucose PC2                                              | -0.039          | 0.645          |        |       |        |       |        |                         |
| low glucose PC3                                              | 0.063           | 0.455          |        |       |        |       |        |                         |
| low glucose PC4                                              | -0.204          | 0.014          | *      |       |        |       |        |                         |
| low glucose PC5                                              | -0.017          | 0.840          |        |       |        |       |        |                         |
| high glucose PC1                                             | -0.163          | 0.053          |        |       |        |       |        |                         |
| high glucose PC2                                             | -0.139          | 0.101          |        |       |        |       |        |                         |
| high glucose PC3                                             | 0.046           | 0.588          |        |       |        |       |        |                         |
| high glucose PC4                                             | -0.151          | 0.075          |        |       |        |       |        |                         |
| high glucose PC5                                             | -0.004          | 0.961          |        |       |        |       |        |                         |
| starvation resistance<br>mean (nutrient restric-<br>tive)    |                 |                | 0.010  | 0.885 |        |       |        | Nelson et al (2016)     |
| starvation resistance<br>mean (nutrient rich)                |                 |                | 0.065  | 0.324 |        |       |        |                         |
| starvation resistance<br>median (nutrient<br>restrictive)    |                 |                | 0.037  | 0.575 |        |       |        |                         |
| starvation resistance<br>median (nutrient rich)              |                 |                | 0.045  | 0.492 |        |       |        |                         |
| starvation resistance<br>max (nutrient restric-<br>tive)     |                 |                | 0.033  | 0.616 |        |       |        |                         |
| starvation resistance<br>max (nutrient rich)                 |                 |                | 0.028  | 0.668 |        |       |        |                         |
| body mass (nutrient<br>restrictive)                          |                 |                | 0.073  | 0.266 |        |       |        |                         |
| body mass (nutrient<br>rich)                                 |                 |                | -0.012 | 0.855 |        |       |        |                         |
| lipid (nutrient restric-<br>tive)                            |                 |                | -0.343 | 0.001 | ***    |       |        |                         |
| lipid (nutrient rich)                                        |                 |                | -0.234 | 0.001 | ***    |       |        |                         |
| protein (nutrient re-<br>strictive)                          |                 |                | -0.057 | 0.388 |        |       |        |                         |
| protein (nutrient rich)                                      |                 |                | -0.011 | 0.872 |        |       |        |                         |
| glucose (nutrient re-<br>strictive)                          |                 |                | -0.106 | 0.105 |        |       |        |                         |
| glucose (nutrient rich)                                      |                 |                | -0.121 | 0.065 |        |       |        |                         |
| lead tolerance                                               | 0.081           | 0.264          | 0.120  | 0.058 |        |       |        | Zhou et al (2016)       |
| lead development time                                        | -0.018          | 0.811          | -0.076 | 0.244 |        | 0.020 | 0.793  |                         |
| DDT mortality (LD50)                                         |                 |                | 0.036  | 0.582 |        |       |        | Schmidt et al (2017)    |
| embryo development<br>time                                   |                 |                |        |       | 0.027  | 0.867 | 0.139  | 0.393                   |
| egg viability                                                |                 |                |        |       | -0.025 | 0.875 | -0.118 | 0.467                   |
| Larval amanitin resis-<br>tance LC50                         |                 |                |        |       | -0.086 | 0.619 | -0.345 | 0.046                   |
| Larval amanitin resis-<br>tance (0.2 ppm)                    |                 |                |        |       | -0.004 | 0.965 | 0.117  | 0.194                   |
| Larval amanitin resis-<br>tance (2 ppm)                      |                 |                |        |       | -0.006 | 0.947 | 0.207  | 0.020                   |
| larval insecticide resis-<br>tance (0.25 ppm)                |                 |                |        |       | 0.175  | 0.022 | 0.003  | 0.973                   |
| larval insecticide resis-<br>tance (0.5 ppm)                 |                 |                |        |       | 0.064  | 0.402 | -0.011 | 0.889                   |
| larval insecticide resis-<br>tance (1 ppm)                   |                 |                |        |       | -0.047 | 0.541 | -0.073 | 0.364                   |
| larval insecticide resis-<br>tance (2 ppm)                   |                 |                |        |       | -0.041 | 0.595 | -0.059 | 0.459                   |
| larval insecticide resis-<br>tance (LD50)                    |                 |                |        |       | -0.028 | 0.712 | 0.050  | 0.535                   |
| larval methylmercury<br>survival (0 M)                       |                 |                |        |       | -0.074 | 0.344 | 0.028  | 0.731                   |
| larval methylmercury<br>survival (5 M)                       |                 |                |        |       | -0.049 | 0.529 | 0.029  | 0.719                   |
| larval methylmercury<br>survival (10 M)                      |                 |                |        |       | -0.068 | 0.381 | 0.006  | 0.946                   |
| larval methylmercury<br>survival (15 M)                      |                 |                |        |       | 0.044  | 0.575 | 0.117  | 0.148                   |
| larval methylmercury<br>+ caffiene survival (0<br>M + 2 mM)  |                 |                |        |       | 0.143  | 0.064 | 0.160  | 0.049                   |
| larval methylmercury<br>+ caffiene survival (10<br>M + 2 mM) |                 |                |        |       | -0.014 | 0.854 | 0.027  | 0.742                   |
|                                                              |                 |                |        |       |        |       |        | Montgomery et al (2014) |
