# Supplementary material
Source: publisher figshare collection journal article supplement (https://gsajournals.figshare.com/articles/dataset/_/8316494)
Supplement: Supplementary file 8 [file 1]

**Table S3:** Results from the gene ontology enrichment analysis for adult anoxia tolerance.

| Annotation Cluster 1 | Enrichment Score: 2.4975622754832516 | Count | %           | PValue      | Genes                                                    | List Total | Pop Hits | Pop Total | Fold Enrichment | Bonferroni  |
|----------------------|--------------------------------------|-------|-------------|-------------|----------------------------------------------------------|------------|----------|-----------|-----------------|-------------|
| Category             | Term                                 |       |             |             |                                                          |            |          |           |                 |             |
| INTERPRO             | IPR007110:Immunoglobulin-like domain | 8     | 6.722689076 | 1.08E-04    | CG13506, FAS3, BABOS, VN, DIP-GAMMA, KEK5, CG15630, DPR3 | 90         | 135      | 10984     | 7.232263374     | 0.021587771 |
| INTERPRO             | IPR013783:Immunoglobulin-like fold   | 8     | 6.722689076 | 5.68E-04    | CG13506, FAS3, BABOS, VN, DIP-GAMMA, KEK5, CG15630, DPR3 | 90         | 177      | 10984     | 5.516133082     | 0.108476635 |
| INTERPRO             | IPR003598:Immunoglobulin subtype 2   | 6     | 5.042016807 | 0.001880545 | CG13506, VN, DIP-GAMMA, KEK5, CG15630, DPR3              | 90         | 109      | 10984     | 6.718042813     | 0.316294365 |
| INTERPRO             | IPR003599:Immunoglobulin subtype     | 6     | 5.042016807 | 0.002037133 | CG13506, BABOS, DIP-GAMMA, KEK5, CG15630, DPR3           | 90         | 111      | 10984     | 6.596996997     | 0.337623162 |
| SMART                | SM00408:IGc2                         | 6     | 5.042016807 | 0.006899341 | CG13506, VN, DIP-GAMMA, KEK5, CG15630, DPR3              | 59         | 109      | 5218      | 4.8682942       | 0.35348885  |
| SMART                | SM00409:IG                           | 6     | 5.042016807 | 0.0074426   | CG13506, BABOS, DIP-GAMMA, KEK5, CG15630, DPR3           | 59         | 111      | 5218      | 4.780577187     | 0.375395947 |
| INTERPRO             | IPR013098:Immunoglobulin I-set       | 4     | 3.361344538 | 0.016300742 | CG13506, VN, KEK5, CG15630                               | 90         | 66       | 10984     | 7.396632997     | 0.963842915 |
| UP_KEYWORDS          | Immunoglobulin domain                | 3     | 2.521008403 | 0.053129894 | FAS3, BABOS, VN                                          | 111        | 47       | 13921     | 8.005175388     | 0.995504788 |

  

| Annotation Cluster 2 | Enrichment Score: 2.4641388084339306      | Count | %           | PValue      | Genes                                                                                                                                                                                                                                                                                       | List Total | Pop Hits | Pop Total | Fold Enrichment | Bonferroni  |
|----------------------|-------------------------------------------|-------|-------------|-------------|---------------------------------------------------------------------------------------------------------------------------------------------------------------------------------------------------------------------------------------------------------------------------------------------|------------|----------|-----------|-----------------|-------------|
| Category             | Term                                      |       |             |             |                                                                                                                                                                                                                                                                                             |            |          |           |                 |             |
| UP_KEYWORDS          | Transmembrane helix                       | 38    | 31.93277311 | 2.03E-03    | OATP58DA, OATP58DB, PPK30, SDC, SHAWL, FZ, SLO2, OR46A, CG43201, LERP, APP, CG12902, WUN2, CG7557, SEMA-1A, IR93A, OATP58DC, PPK19, PMCA, PDFR, NCKX30C, BABOS, AXO, FUCTA, AC13E, MELTRIN, FZ2, CG18031, FAS3, CG3036, CG12917, CG13723, KEK5, MCT1, PGRP-LA, SLOB, CG3822, CG17600        | 111        | 2985     | 13921     | 1.59656541      | 0.181909333 |
| UP_KEYWORDS          | Transmembrane                             | 38    | 31.93277311 | 2.09E-03    | OATP58DA, OATP58DB, PPK30, SDC, SHAWL, FZ, SLO2, OR46A, CG43201, LERP, APP, CG12902, WUN2, CG7557, SEMA-1A, IR93A, OATP58DC, PPK19, PMCA, PDFR, NCKX30C, BABOS, AXO, FUCTA, AC13E, MELTRIN, FZ2, CG18031, FAS3, CG3036, CG12917, CG13723, KEK5, MCT1, PGRP-LA, SLOB, CG3822, CG17600        | 111        | 2990     | 13921     | 1.593895568     | 0.18704542  |
| UP_KEYWORDS          | Membrane                                  | 39    | 32.77310924 | 0.005430775 | OATP58DA, OATP58DB, PPK30, SDC, SHAWL, FZ, SLO2, OR46A, CG43201, LERP, APP, CG12902, WUN2, CG7557, SEMA-1A, DALLY, IR93A, OATP58DC, PPK19, PMCA, PDFR, NCKX30C, BABOS, AXO, FUCTA, AC13E, MELTRIN, FZ2, CG18031, FAS3, CG3036, CG12917, CG13723, KEK5, MCT1, PGRP-LA, SLOB, CG3822, CG17600 | 111        | 3266     | 13921     | 1.497600172     | 0.416734024 |
| GOTERM_CC_DIRECT     | GO:0016021~integral component of membrane | 35    | 29.41176471 | 0.0060518   | PPK30, SDC, FZ, SHAWL, SLO2, OR46A, CG43201, LERP, APP, CG12902, WUN2, CG7557, SEMA-1A, IR93A, OATP58DC, PPK19, PMCA, PDFR, NCKX30C, BABOS, AXO, FUCTA, AC13E, MELTRIN, FZ2, CG18031, FAS3, CG3036, CG12917, CG13723, MCT1, PGRP-LA, SLOB, CG3822, CG17600                                  | 83         | 2814     | 10026     | 1.502427621     | 0.403076192 |

  

| Annotation Cluster 3 | Enrichment Score: 2.3636463213015095                                           | Count | %           | PValue      | Genes                                      | List Total | Pop Hits | Pop Total | Fold Enrichment | Bonferroni  |
|----------------------|--------------------------------------------------------------------------------|-------|-------------|-------------|--------------------------------------------|------------|----------|-----------|-----------------|-------------|
| Category             | Term                                                                           |       |             |             |                                            |            |          |           |                 |             |
| GOTERM_BP_DIRECT     | GO:0071702~organic substance transport                                         | 3     | 2.521008403 | 1.68E-03    | OATP58DA, OATP58DB, OATP58DC               | 88         | 8        | 10996     | 46.85795455     | 0.495566789 |
| GOTERM_BP_DIRECT     | GO:0043252~sodium-independent organic anion transport                          | 3     | 2.521008403 | 1.68E-03    | OATP58DA, OATP58DB, OATP58DC               | 88         | 8        | 10996     | 46.85795455     | 0.495566789 |
| INTERPRO             | IPR004156:Organic anion transporter polypeptide OATP                           | 3     | 2.521008403 | 0.001761049 | OATP58DA, OATP58DB, OATP58DC               | 90         | 8        | 10984     | 45.76666667     | 0.2995592   |
| GOTERM_MF_DIRECT     | GO:0022804~active transmembrane transporter activity                           | 3     | 2.521008403 | 0.001793674 | OATP58DA, OATP58DB, OATP58DC               | 77         | 8        | 9284      | 45.21428571     | 0.196698109 |
| GOTERM_MF_DIRECT     | GO:0015347~sodium-independent organic anion transmembrane transporter activity | 3     | 2.521008403 | 0.001793674 | OATP58DA, OATP58DB, OATP58DC               | 77         | 8        | 9284      | 45.21428571     | 0.196698109 |
| GOTERM_MF_DIRECT     | GO:0022857~transmembrane transporter activity                                  | 4     | 3.361344538 | 0.033242277 | OATP58DA, OATP58DB, CG3036, OATP58DC       | 77         | 86       | 9284      | 5.607973422     | 0.983828388 |
| INTERPRO             | IPR020846:Major facilitator superfamily domain                                 | 5     | 4.201680672 | 0.053570711 | OATP58DA, OATP58DB, CG3036, MCT1, OATP58DC | 90         | 175      | 10984     | 3.486984127     | 0.999985215 |

  

| Annotation Cluster 4 | Enrichment Score: 2.0575085413985867 | Count | %           | PValue      | Genes                                                                            | List Total | Pop Hits | Pop Total | Fold Enrichment | Bonferroni  |
|----------------------|--------------------------------------|-------|-------------|-------------|----------------------------------------------------------------------------------|------------|----------|-----------|-----------------|-------------|
| Category             | Term                                 |       |             |             |                                                                                  |            |          |           |                 |             |
| UP_KEYWORDS          | Ion transport                        | 9     | 7.56302521  | 2.41E-04    | OATP58DA, OATP58DB, PPK30, NCKX30C, SHAWL, OATP58DC, PMCA, PPK19, CG3822         | 111        | 208      | 13921     | 5.426585239     | 0.02362354  |
| UP_KEYWORDS          | Transport                            | 10    | 8.403361345 | 3.44E-02    | OATP58DA, OATP58DB, PPK30, NCKX30C, OBP99A, SHAWL, OATP58DC, PMCA, PPK19, CG3822 | 111        | 564      | 13921     | 2.22365983      | 0.968877516 |
| UP_KEYWORDS          | Ion channel                          | 4     | 3.361344538 | 0.080826204 | PPK30, SHAWL, PPK19, CG3822                                                      | 111        | 128      | 13921     | 3.91920045      | 0.999762116 |

  

| Annotation Cluster 5 | Enrichment Score: 1.842111602621688                                             | Count | %           | PValue      | Genes                                                                                                                    | List Total | Pop Hits | Pop Total | Fold Enrichment | Bonferroni  |
|----------------------|---------------------------------------------------------------------------------|-------|-------------|-------------|--------------------------------------------------------------------------------------------------------------------------|------------|----------|-----------|-----------------|-------------|
| Category             | Term                                                                            |       |             |             |                                                                                                                          |            |          |           |                 |             |
| UP_KEYWORDS          | Alternative splicing                                                            | 20    | 16.80672269 | 4.55E-07    | CPO, LAB, NCKX30C, SPT5, EIP75B, MOB2, VN, UBX, SDC, RDX, SICK, OR46A, FAS3, HOW, ARGK, PROS, TET, PGRP-LA, SLOB, SHROOM | 111        | 631      | 13921     | 3.975100298     | 5.04E-04    |
| UP_SEQ_FEATURE       | compositionally biased region:Gln-rich                                          | 10    | 8.403361345 | 4.45E-05    | CPO, H15, LAB, HOW, EIP75B, VN, CDK8, SICK, RDX, PROS                                                                    | 36         | 160      | 3113      | 5.404513889     | 0.05316126  |
| UP_SEQ_FEATURE       | splice variant                                                                  | 18    | 15.12605042 | 9.81E-05    | CPO, LAB, NCKX30C, SPT5, EIP75B, MOB2, VN, UBX, SDC, FZ, RDX, SICK, FAS3, HOW, ARGK, PROS, PGRP-LA, SHROOM               | 36         | 610      | 3113      | 2.551639344     | 0.117093332 |
| UP_KEYWORDS          | Developmental protein                                                           | 14    | 11.76470588 | 7.96E-04    | CPO, LAB, EIP75B, SNA, SDC, UBX, VN, FZ, RDX, FZ2, FAS3, HOW, SEMA-1A, PROS                                              | 111        | 593      | 13921     | 2.960879936     | 0.878738306 |
| UP_KEYWORDS          | Transcription                                                                   | 10    | 8.403361345 | 0.008304846 | MED6, H15, LAB, EIP75B, SPT5, MED16, FOXF, UBX, CDK8, PROS                                                               | 111        | 442      | 13921     | 2.83743019      | 8.824873132 |
| GOTERM_BP_DIRECT     | GO:0045944~positive regulation of transcription from RNA polymerase II promoter | 7     | 5.882352941 | 0.009309158 | BTEB2, H15, LAB, SPT5, SNA, PROS, TET                                                                                    | 88         | 228      | 10996     | 3.836323764     | 12.25910997 |
| UP_KEYWORDS          | Transcription regulation                                                        | 9     | 7.56302521  | 0.01725534  | MED6, H15, LAB, EIP75B, SPT5, MED16, UBX, CDK8, PROS                                                                     | 111        | 416      | 13921     | 2.71329262      | 17.53769963 |
| UP_SEQ_FEATURE       | compositionally biased region:Poly-Ala                                          | 5     | 4.201680672 | 0.029545846 | CPO, H15, EIP75B, UBX, RASGAP1                                                                                           | 36         | 106      | 3113      | 4.078878407     | 30.10273847 |
| GOTERM_BP_DIRECT     | GO:0000122~negative regulation of transcription from RNA polymerase II promoter | 5     | 4.201680672 | 0.030326748 | EIP75B, SPT5, SNA, UBX, PROS                                                                                             | 88         | 149      | 10996     | 4.193105552     | 34.99008614 |

|                              |                                                                         |              |             |               |                                                                                                          |                   |                 |                  |                        |                   |
|------------------------------|-------------------------------------------------------------------------|--------------|-------------|---------------|----------------------------------------------------------------------------------------------------------|-------------------|-----------------|------------------|------------------------|-------------------|
| UP_KEYWORDS                  | Nucleus                                                                 | 15           | 12.60504202 | 0.062716138   | CPO, LAB, SPT5, EIP75B, MOB2, FOXF, SNA, UBX, CDK8, RDX, MED6, H15, HOW, MED16, PROS                     | 111               | 1134            | 13921            | 1.658920826            | 51.2045871        |
| GOTERM_MF_DIRECT             | GO:0003700~transcription factor activity, sequence-specific DNA binding | 6            | 5.042016807 | 0.074363637   | H15, LAB, EIP75B, FOXF, UBX, PROS                                                                        | 77                | 275             | 9284             | 2.630649351            | 58.92231132       |
| GOTERM_BP_DIRECT             | GO:0006351~transcription, DNA-templated                                 | 7            | 5.882352941 | 0.077109357   | MED6, H15, LAB, EIP75B, FOXF, UBX, PROS                                                                  | 88                | 376             | 10996            | 2.326281431            | 67.43984571       |
| UP_KEYWORDS                  | Homeobox                                                                | 3            | 2.521008403 | 0.19854376    | LAB, UBX, PROS                                                                                           | 111               | 104             | 13921            | 3.617723493            | 91.38712459       |
| UP_KEYWORDS                  | DNA-binding                                                             | 7            | 5.882352941 | 0.248278512   | H15, LAB, EIP75B, FOXF, SNA, UBX, PROS                                                                   | 111               | 535             | 13921            | 1.640936263            | 95.76437749       |
| GOTERM_CC_DIRECT             | GO:0005634~nucleus                                                      | 18           | 15.12605042 | 0.323097966   | CPO, LAB, EIP75B, MOB2, FOXF, SNA, UBX, EIP63F-1, CDK8, RDX, FZ2, MED6, BTEB2, H15, MAMO, HOW, PROS, TET | 83                | 1832            | 10026            | 1.186852212            | 98.49798877       |
| INTERPRO                     | IPR009057:Homeodomain-like                                              | 3            | 2.521008403 | 0.340803719   | LAB, UBX, PROS                                                                                           | 90                | 149             | 10984            | 2.457270694            | 99.46563073       |
| GOTERM_BP_DIRECT             | GO:0006355~regulation of transcription, DNA-templated                   | 5            | 4.201680672 | 0.392217434   | LAB, FOXF, UBX, EXP, PROS                                                                                | 88                | 401             | 10996            | 1.558036726            | 99.90535594       |
| GOTERM_MF_DIRECT             | GO:0003677~DNA binding                                                  | 6            | 5.042016807 | 0.479636502   | H15, EIP75B, SNA, UBX, PROS, TET                                                                         | 77                | 555             | 9284             | 1.303474903            | 99.94584345       |
| <b>Annotation Cluster 6</b>  | <b>Enrichment Score: 1.6094587917754268</b>                             |              |             |               |                                                                                                          |                   |                 |                  |                        |                   |
| <b>Category</b>              | <b>Term</b>                                                             | <b>Count</b> | <b>%</b>    | <b>PValue</b> | <b>Genes</b>                                                                                             | <b>List Total</b> | <b>Pop Hits</b> | <b>Pop Total</b> | <b>Fold Enrichment</b> | <b>Bonferroni</b> |
| UP_KEYWORDS                  | Glycoprotein                                                            | 13           | 10.92436975 | 6.13E-04      | FZ2, PDFR, CG25C, NCKX30C, FAS3, VN, SDC, FUCTA, FZ, OR46A, DALLY, SEMA-1A, PGRP-LA                      | 111               | 503             | 13921            | 3.241326814            | 6.77E-01          |
| UP_SEQ_FEATURE               | glycosylation site:N-linked (GlcNAc...)                                 | 13           | 10.92436975 | 1.47E-03      | FZ2, PDFR, CG25C, NCKX30C, FAS3, VN, SDC, FUCTA, FZ, OR46A, DALLY, SEMA-1A, PGRP-LA                      | 36                | 423             | 3113             | 2.657538744            | 1.738713222       |
| UP_KEYWORDS                  | Disulfide bond                                                          | 12           | 10.08403361 | 1.68E-02      | MELTRIN, FZ2, CG25C, FAS3, OBP99A, AXO, VN, CG9134, FZ, KEK5, SEMA-1A, PGRP-LA                           | 111               | 670             | 13921            | 2.246228318            | 17.08509488       |
| UP_SEQ_FEATURE               | topological domain:Extracellular                                        | 9            | 7.56302521  | 1.96E-02      | FZ2, NCKX30C, PDFR, FAS3, SDC, FZ, OR46A, SEMA-1A, PGRP-LA                                               | 36                | 312             | 3113             | 2.494391026            | 21.0530594        |
| UP_SEQ_FEATURE               | disulfide bond                                                          | 8            | 6.722689076 | 0.025313939   | FZ2, CG25C, FAS3, OBP99A, VN, FZ, SEMA-1A, PGRP-LA                                                       | 36                | 265             | 3113             | 2.61048218             | 26.37476387       |
| UP_SEQ_FEATURE               | topological domain:Cytoplasmic                                          | 10           | 8.403361345 | 0.027477992   | FZ2, NCKX30C, PDFR, FAS3, SDC, FUCTA, FZ, OR46A, SEMA-1A, PGRP-LA                                        | 36                | 397             | 3113             | 2.178141618            | 28.30329301       |
| UP_KEYWORDS                  | Cell membrane                                                           | 7            | 5.882352941 | 0.089487136   | FZ2, PDFR, FZ, OR46A, DALLY, PGRP-LA, CG3822                                                             | 111               | 391             | 13921            | 2.245270846            | 64.60372757       |
| UP_SEQ_FEATURE               | signal peptide                                                          | 9            | 7.56302521  | 0.096348946   | FZ2, CG25C, FAS3, OBP99A, SDC, VN, FZ, SEMA-1A, DALLY                                                    | 36                | 427             | 3113             | 1.822599532            | 70.17530212       |
| UP_SEQ_FEATURE               | transmembrane region                                                    | 10           | 8.403361345 | 0.171307045   | FZ2, NCKX30C, PDFR, FAS3, SDC, FUCTA, FZ, OR46A, SEMA-1A, PGRP-LA                                        | 36                | 566             | 3113             | 1.527777778            | 89.39563378       |
| UP_KEYWORDS                  | Transducer                                                              | 4            | 3.361344538 | 0.264851709   | FZ2, PDFR, FZ, OR46A                                                                                     | 111               | 226             | 13921            | 2.219724149            | 96.69130569       |
| <b>Annotation Cluster 7</b>  | <b>Enrichment Score: 1.5106741430411734</b>                             |              |             |               |                                                                                                          |                   |                 |                  |                        |                   |
| <b>Category</b>              | <b>Term</b>                                                             | <b>Count</b> | <b>%</b>    | <b>PValue</b> | <b>Genes</b>                                                                                             | <b>List Total</b> | <b>Pop Hits</b> | <b>Pop Total</b> | <b>Fold Enrichment</b> | <b>Bonferroni</b> |
| INTERPRO                     | IPR000210:BTB/POZ-like                                                  | 4            | 3.361344538 | 2.21E-02      | CG11275, MAMO, SHAWL, RDX                                                                                | 90                | 74              | 10984            | 6.596996997            | 2.44E+01          |
| INTERPRO                     | IPR011333:BTB/POZ fold                                                  | 4            | 3.361344538 | 3.15E-02      | CG11275, MAMO, SHAWL, RDX                                                                                | 90                | 85              | 10984            | 5.743267974            | 33.130197         |
| SMART                        | SM00225:BTB                                                             | 4            | 3.361344538 | 4.22E-02      | CG11275, MAMO, SHAWL, RDX                                                                                | 59                | 70              | 5218             | 5.053753027            | 35.39291287       |
| <b>Annotation Cluster 8</b>  | <b>Enrichment Score: 1.4768770120012642</b>                             |              |             |               |                                                                                                          |                   |                 |                  |                        |                   |
| <b>Category</b>              | <b>Term</b>                                                             | <b>Count</b> | <b>%</b>    | <b>PValue</b> | <b>Genes</b>                                                                                             | <b>List Total</b> | <b>Pop Hits</b> | <b>Pop Total</b> | <b>Fold Enrichment</b> | <b>Bonferroni</b> |
| UP_KEYWORDS                  | Activator                                                               | 5            | 4.201680672 | 1.46E-02      | MED6, SPT5, MED16, UBX, CDK8                                                                             | 111               | 119             | 13921            | 5.269513211            | 1.51E+01          |
| GOTERM_CC_DIRECT             | GO:0016592~mediator complex                                             | 3            | 2.521008403 | 2.96E-02      | MED6, MED16, CDK8                                                                                        | 83                | 33              | 10026            | 10.98138007            | 27.63601562       |
| GOTERM_MF_DIRECT             | GO:0001104~RNA polymerase II transcription cofactor activity            | 3            | 2.521008403 | 3.13E-02      | MED6, MED16, CDK8                                                                                        | 77                | 34              | 9284             | 10.63865546            | 30.68876267       |
| GOTERM_BP_DIRECT             | GO:0006367~transcription initiation from RNA polymerase II promoter     | 3            | 2.521008403 | 9.11E-02      | MED6, MED16, CDK8                                                                                        | 88                | 64              | 10996            | 5.857244318            | 73.69818428       |
| <b>Annotation Cluster 9</b>  | <b>Enrichment Score: 1.3591453957574986</b>                             |              |             |               |                                                                                                          |                   |                 |                  |                        |                   |
| <b>Category</b>              | <b>Term</b>                                                             | <b>Count</b> | <b>%</b>    | <b>PValue</b> | <b>Genes</b>                                                                                             | <b>List Total</b> | <b>Pop Hits</b> | <b>Pop Total</b> | <b>Fold Enrichment</b> | <b>Bonferroni</b> |
| INTERPRO                     | IPR016187:C-type lectin fold                                            | 4            | 3.361344538 | 6.45E-03      | CG15358, CG25C, CG9134, RGN                                                                              | 90                | 47              | 10984            | 10.38676123            | 7.80E+00          |
| INTERPRO                     | IPR001304:C-type lectin                                                 | 3            | 2.521008403 | 4.53E-02      | CG15358, CG9134, RGN                                                                                     | 90                | 42              | 10984            | 8.717460317            | 44.15239643       |
| INTERPRO                     | IPR016186:C-type lectin-like                                            | 3            | 2.521008403 | 4.93E-02      | CG15358, CG9134, RGN                                                                                     | 90                | 44              | 10984            | 8.321212121            | 46.99514068       |
| SMART                        | SM00034:CLECT                                                           | 3            | 2.521008403 | 7.24E-02      | CG15358, CG9134, RGN                                                                                     | 59                | 40              | 5218             | 6.63050847             | 53.2711787        |
| GOTERM_MF_DIRECT             | GO:0030246~carbohydrate binding                                         | 3            | 2.521008403 | 0.153412136   | CG15358, CG9134, RGN                                                                                     | 77                | 85              | 9284             | 4.255462185            | 85.30262144       |
| <b>Annotation Cluster 10</b> | <b>Enrichment Score: 1.2456397566889965</b>                             |              |             |               |                                                                                                          |                   |                 |                  |                        |                   |
| <b>Category</b>              | <b>Term</b>                                                             | <b>Count</b> | <b>%</b>    | <b>PValue</b> | <b>Genes</b>                                                                                             | <b>List Total</b> | <b>Pop Hits</b> | <b>Pop Total</b> | <b>Fold Enrichment</b> | <b>Bonferroni</b> |
| UP_KEYWORDS                  | Sodium transport                                                        | 3            | 2.521008403 | 4.92E-02      | PPK30, NCKX30C, PPK19                                                                                    | 111               | 45              | 13921            | 8.360960961            | 4.28E+01          |
| UP_KEYWORDS                  | Sodium                                                                  | 3            | 2.521008403 | 5.31E-02      | PPK30, NCKX30C, PPK19                                                                                    | 111               | 47              | 13921            | 8.005175388            | 45.38183388       |
| GOTERM_BP_DIRECT             | GO:0006814~sodium ion transport                                         | 3            | 2.521008403 | 7.02E-02      | PPK30, NCKX30C, PPK19                                                                                    | 88                | 55              | 10996            | 6.815702479            | 63.84923541       |
| <b>Annotation Cluster 11</b> | <b>Enrichment Score: 1.2268476011602796</b>                             |              |             |               |                                                                                                          |                   |                 |                  |                        |                   |
| <b>Category</b>              | <b>Term</b>                                                             | <b>Count</b> | <b>%</b>    | <b>PValue</b> | <b>Genes</b>                                                                                             | <b>List Total</b> | <b>Pop Hits</b> | <b>Pop Total</b> | <b>Fold Enrichment</b> | <b>Bonferroni</b> |
| GOTERM_BP_DIRECT             | GO:0007411~axon guidance                                                | 7            | 5.882352941 | 3.42E-03      | FZ2, FAS3, SDC, CDK8, SEMA-1A, SM, PROS                                                                  | 88                | 185             | 10996            | 4.728009828            | 4.68E+00          |
| UP_KEYWORDS                  | Neurogenesis                                                            | 3            | 2.521008403 | 1.45E-01      | FAS3, SDC, SEMA-1A                                                                                       | 111               | 85              | 13921            | 4.426391097            | 82.4149932        |
| UP_KEYWORDS                  | Differentiation                                                         | 3            | 2.521008403 | 4.20E-01      | FAS3, SDC, SEMA-1A                                                                                       | 111               | 181             | 13921            | 2.078691952            | 99.76095986       |
| <b>Annotation Cluster 12</b> | <b>Enrichment Score: 1.0608530571366437</b>                             |              |             |               |                                                                                                          |                   |                 |                  |                        |                   |
| <b>Category</b>              | <b>Term</b>                                                             | <b>Count</b> | <b>%</b>    | <b>PValue</b> | <b>Genes</b>                                                                                             | <b>List Total</b> | <b>Pop Hits</b> | <b>Pop Total</b> | <b>Fold Enrichment</b> | <b>Bonferroni</b> |
| KEGG_PATHWAY                 | dme04310:Wnt signaling pathway                                          | 3            | 2.521008403 | 6.46E-02      | FZ2, FZ, DALLY                                                                                           | 14                | 89              | 2737             | 6.58988764             | 3.78E+01          |
| UP_KEYWORDS                  | Cell membrane                                                           | 7            | 5.882352941 | 8.95E-02      | FZ2, PDFR, FZ, OR46A, DALLY, PGRP-LA, CG3822                                                             | 111               | 391             | 13921            | 2.245270846            | 64.60372757       |
| GOTERM_BP_DIRECT             | GO:0016055~Wnt signaling pathway                                        | 3            | 2.521008403 | 1.14E-01      | FZ2, FZ, DALLY                                                                                           | 88                | 73              | 10996            | 5.135118306            | 81.46559309       |
