# Supplementary material
Source: publisher figshare collection journal article supplement (https://gsajournals.figshare.com/articles/dataset/_/8316494)
Supplement: Supplementary file 10 [file 1]

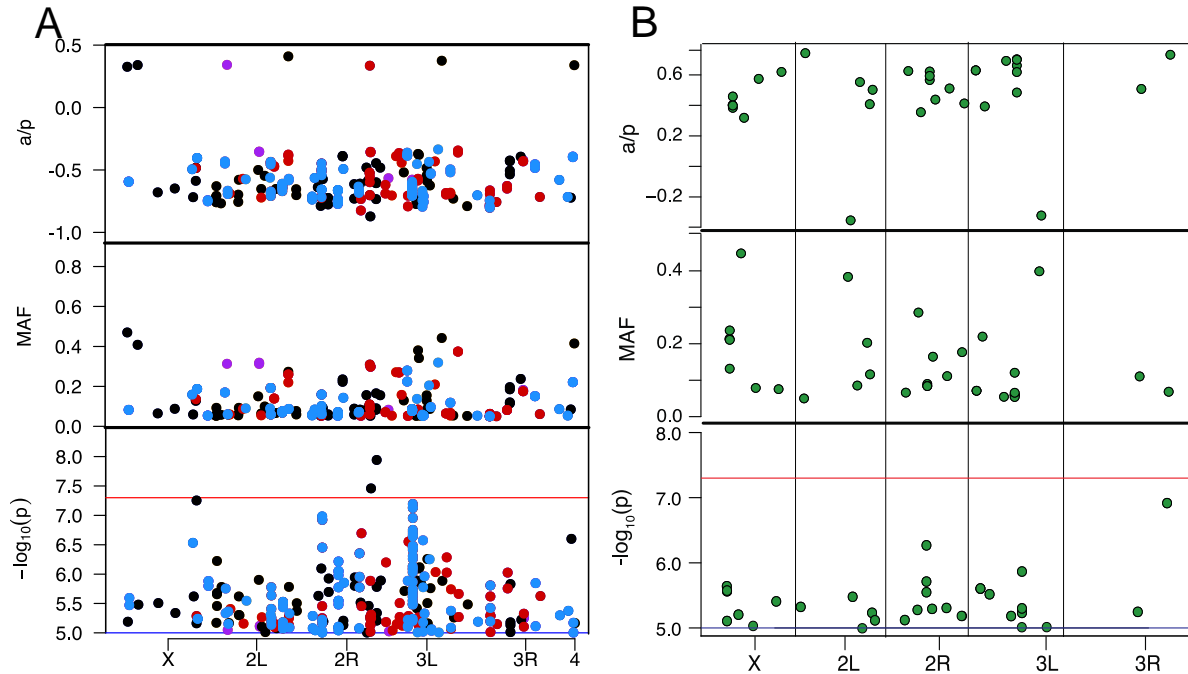

**Figure S4** Significant SNPs identified in the GWAS are plotted for adults (A) and larvae (B). Effect sizes normalized by the phenotypic standard variation ( $\alpha/p$ ) are plotted in the top panel. The middle panel shows the minor allele frequencies (MAF) for each significant SNP. P-values plotted as  $-\log_{10}(p)$  shown in the bottom panel for only SNPs significant at  $p < 0.0001$ . For adults, colors represent significant SNPs for each of the four adult traits analyzed (Female: red, male: blue, pooled sex average: purple, difference between sexes: black).
