# Supplementary material
Source: publisher figshare collection journal article supplement (https://gsajournals.figshare.com/articles/dataset/_/8316494)
Supplement: Supplementary file 11 [file 1]

Table S6: Results of the likelihood ratio test comparing the effects of RNAi-mediated knockdown on adult anoxia tolerance between males and females. Significance at  $p < 0.001$ \*\*\*,  $p < 0.01$ \*\* ,  $p < 0.05$ \*

| gene    | genotype | term | ChiSq    | df | p.value  | sig |
|---------|----------|------|----------|----|----------|-----|
| babos   | uas/gal4 | sex  | 0.022919 | 1  | 0.879669 |     |
| CG10089 | uas/gal4 | sex  | 2.456262 | 1  | 0.117057 |     |
| MED6    | uas/gal4 | sex  | 1.97077  | 1  | 0.160366 |     |
| ppk19   | uas/gal4 | sex  | 4.4038   | 1  | 0.035859 | *   |
| ppk30   | uas/gal4 | sex  | 4.951541 | 1  | 0.026067 | *   |
| SLO2    | uas/gal4 | sex  | 3.880548 | 1  | 0.048849 | *   |
