# Supplementary material
Source: publisher figshare collection journal article supplement (https://gsajournals.figshare.com/articles/dataset/_/8316494)
Supplement: Supplementary file 12 [file 1]

**Table S4:** Results from the gene ontology enrichment analysis for larval anoxia tolerance. Only clusters with enrichment scores > 2 were shown.

| Annotation Cluster 1 | Enrichment Score: 2.5063184924448074 |       |         |        |                                                                         |            |          |           |                 |                      |  |
|----------------------|--------------------------------------|-------|---------|--------|-------------------------------------------------------------------------|------------|----------|-----------|-----------------|----------------------|--|
| Category             | Term                                 | Count | %       | PValue | Genes                                                                   | List Total | Pop Hits | Pop Total | Fold Enrichment | Bonferroni corrected |  |
| UP_KEYWORDS          | Alternative splicing                 | 7     | 24.1379 | 0.0003 | PDE11, LASP, FS(1)H, CHIF, DRE4, PRM, CG31145                           | 22         | 631      | 13921     | 7.0197          | 0.0115               |  |
| UP_KEYWORDS          | Coiled coil                          | 10    | 34.4828 | 0.0003 | PDE11, CG42231, LASP, CG8910, FS(1)H, CHIF, DRE4, PRM, CG2258, X11LBETA | 22         | 1594     | 13921     | 3.9697          | 0.0120               |  |
| UP_SEQ_FEATURE       | splice variant                       | 5     | 17.2414 | 0.0309 | PDE11, LASP, FS(1)H, CHIF, DRE4                                         | 8          | 610      | 3113      | 3.1895          | 0.7641               |  |
| UP_KEYWORDS          | Phosphoprotein                       | 5     | 17.2414 | 0.0444 | LASP, FS(1)H, CHIF, DRE4, PRM                                           | 22         | 909      | 13921     | 3.4806          | 0.8703               |  |
| Annotation Cluster 2 | Enrichment Score: 2.3720705430248015 |       |         |        |                                                                         |            |          |           |                 |                      |  |
| Category             | Term                                 | Count | %       | PValue | Genes                                                                   | List Total | Pop Hits | Pop Total | Fold Enrichment | Bonferroni corrected |  |
| UP_KEYWORDS          | SH3 domain                           | 3     | 10.3448 | 0.0024 | LASP, CG2258, CG32082                                                   | 22         | 49       | 13921     | 38.7412         | 0.1042               |  |
| INTERPRO             | IPR001452:Src homology-3 domain      | 3     | 10.3448 | 0.0045 | LASP, CG2258, CG32082                                                   | 17         | 70       | 10984     | 27.6908         | 0.1813               |  |
| SMART                | SM00326:SH3                          | 3     | 10.3448 | 0.0069 | LASP, CG2258, CG32082                                                   | 12         | 61       | 5218      | 21.3852         | 0.1173               |  |
| Annotation Cluster 3 | Enrichment Score: 0.3333377086874277 |       |         |        |                                                                         |            |          |           |                 |                      |  |
| Category             | Term                                 | Count | %       | PValue | Genes                                                                   | List Total | Pop Hits | Pop Total | Fold Enrichment | Bonferroni corrected |  |
| GOTERM_CC_DIRECT     | GO:0016021~integral component of mem | 6     | 20.6897 | 0.3530 | CG43795, FS(1)H, CG33144, CG9747, CG31145, CG43954                      | 15         | 2814     | 10026     | 1.4252          | 1.0000               |  |
| UP_KEYWORDS          | Transmembrane helix                  | 6     | 20.6897 | 0.4799 | CG43795, FS(1)H, CG33144, CG9747, CG31145, CG43954                      | 22         | 2985     | 13921     | 1.2719          | 1.0000               |  |
| UP_KEYWORDS          | Transmembrane                        | 6     | 20.6897 | 0.4815 | CG43795, FS(1)H, CG33144, CG9747, CG31145, CG43954                      | 22         | 2990     | 13921     | 1.2698          | 1.0000               |  |
| UP_KEYWORDS          | Membrane                             | 6     | 20.6897 | 0.5690 | CG43795, FS(1)H, CG33144, CG9747, CG31145, CG43954                      | 22         | 3266     | 13921     | 1.1625          | 1.0000               |  |
