# Supplementary material
Source: publisher figshare collection journal article supplement (https://gsajournals.figshare.com/articles/dataset/_/8316494)

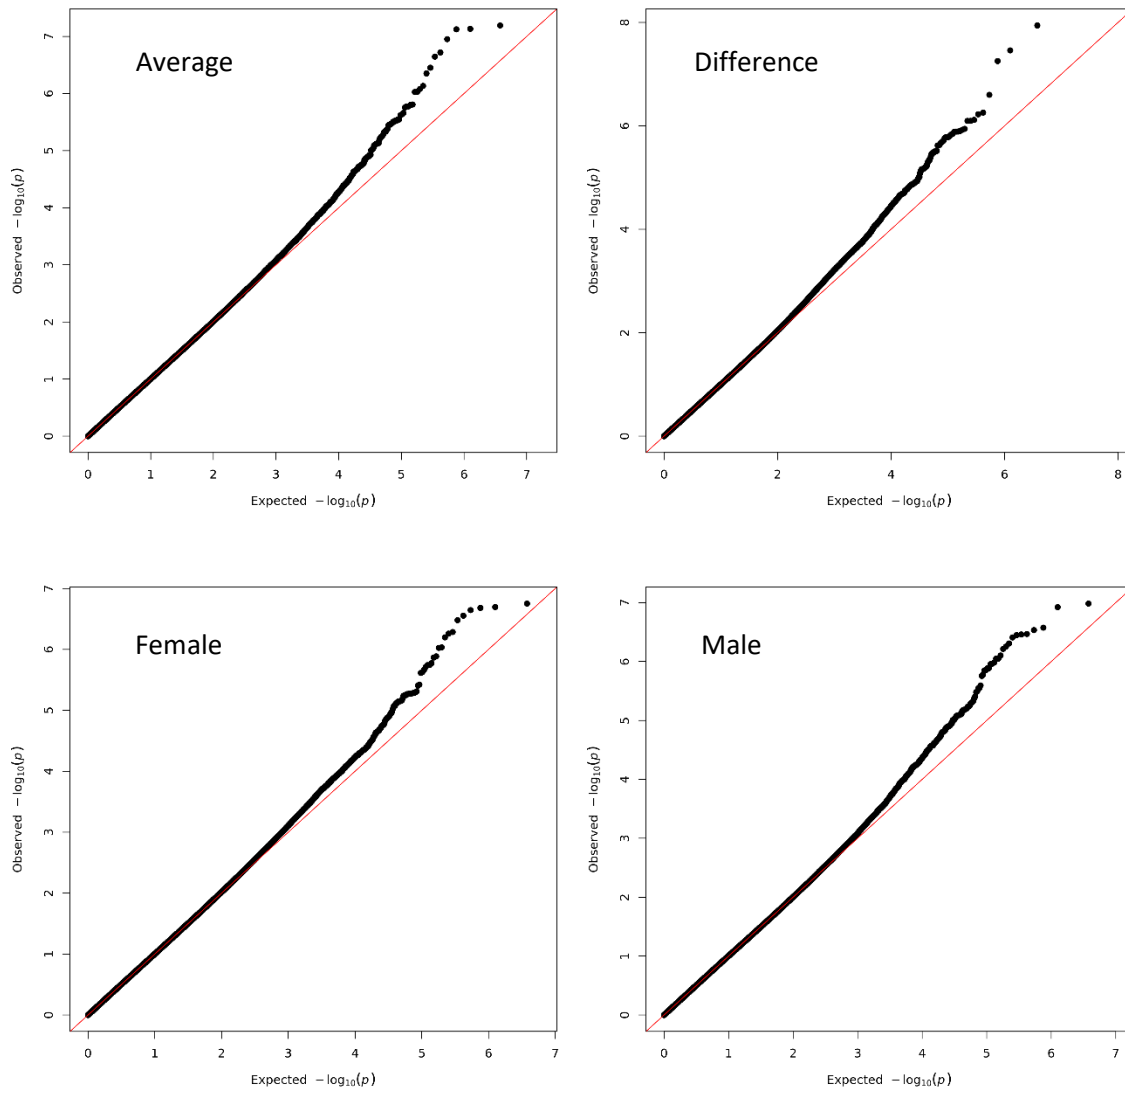

Supplemental Figure S2. Quantile-Quantile plots for adult anoxia tolerance.

Supplement: Supplementary file 6 [file 1]

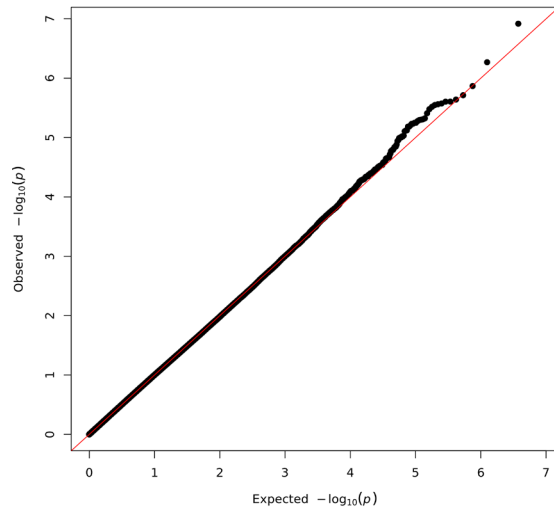

Supplemental Figure S3. Quantile-Quantile plots for larval anoxia tolerance.

Supplement: Supplementary file 9 [file 1]
